# Supplementary material
Source: PubMed Central journal article supplement (PMC2718273)
Supplement: mmc1.pdf [file mmc1.pdf]

Biophysical Journal, Volume 96

**Supporting Material**

**Histone Octamer Helical Tubes Suggest that an Internucleosomal 4-Helix Bundle Stabilizes the Chromatin Fiber**

Timothy D. Frouws, Hugh –G. Patterson, and Bryan T. Sewell

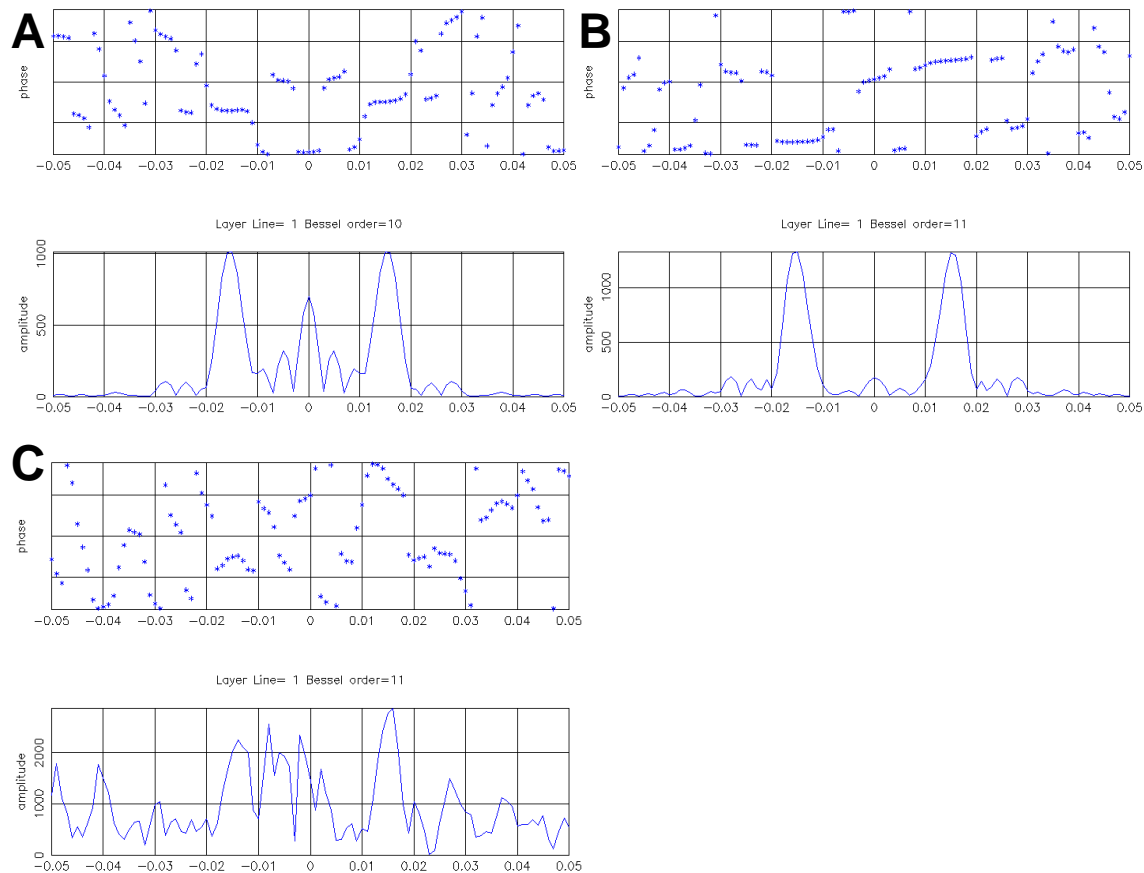

**Supplementary Figure 1.** Amplitudes and phases of an extracted  $l = 4$  layer line (at  $1/280 \text{ \AA}^{-1}$ ) from the Fourier transform of single images. (A) For a projection of a  $D_{10}$  model helix wherein phases are even for the maxima. (B) For a projection of a  $D_{11}$  model helix. Amplitudes are still identical the  $D_{10}$  model, yet the phases for the maxima now differ by  $180^\circ$ . (C) For a single large image of an individual fiber. Here the phases for the maxima clearly differ by close to  $180^\circ$ , and indicates the fiber has  $D_{11}$  symmetry like that of (B).

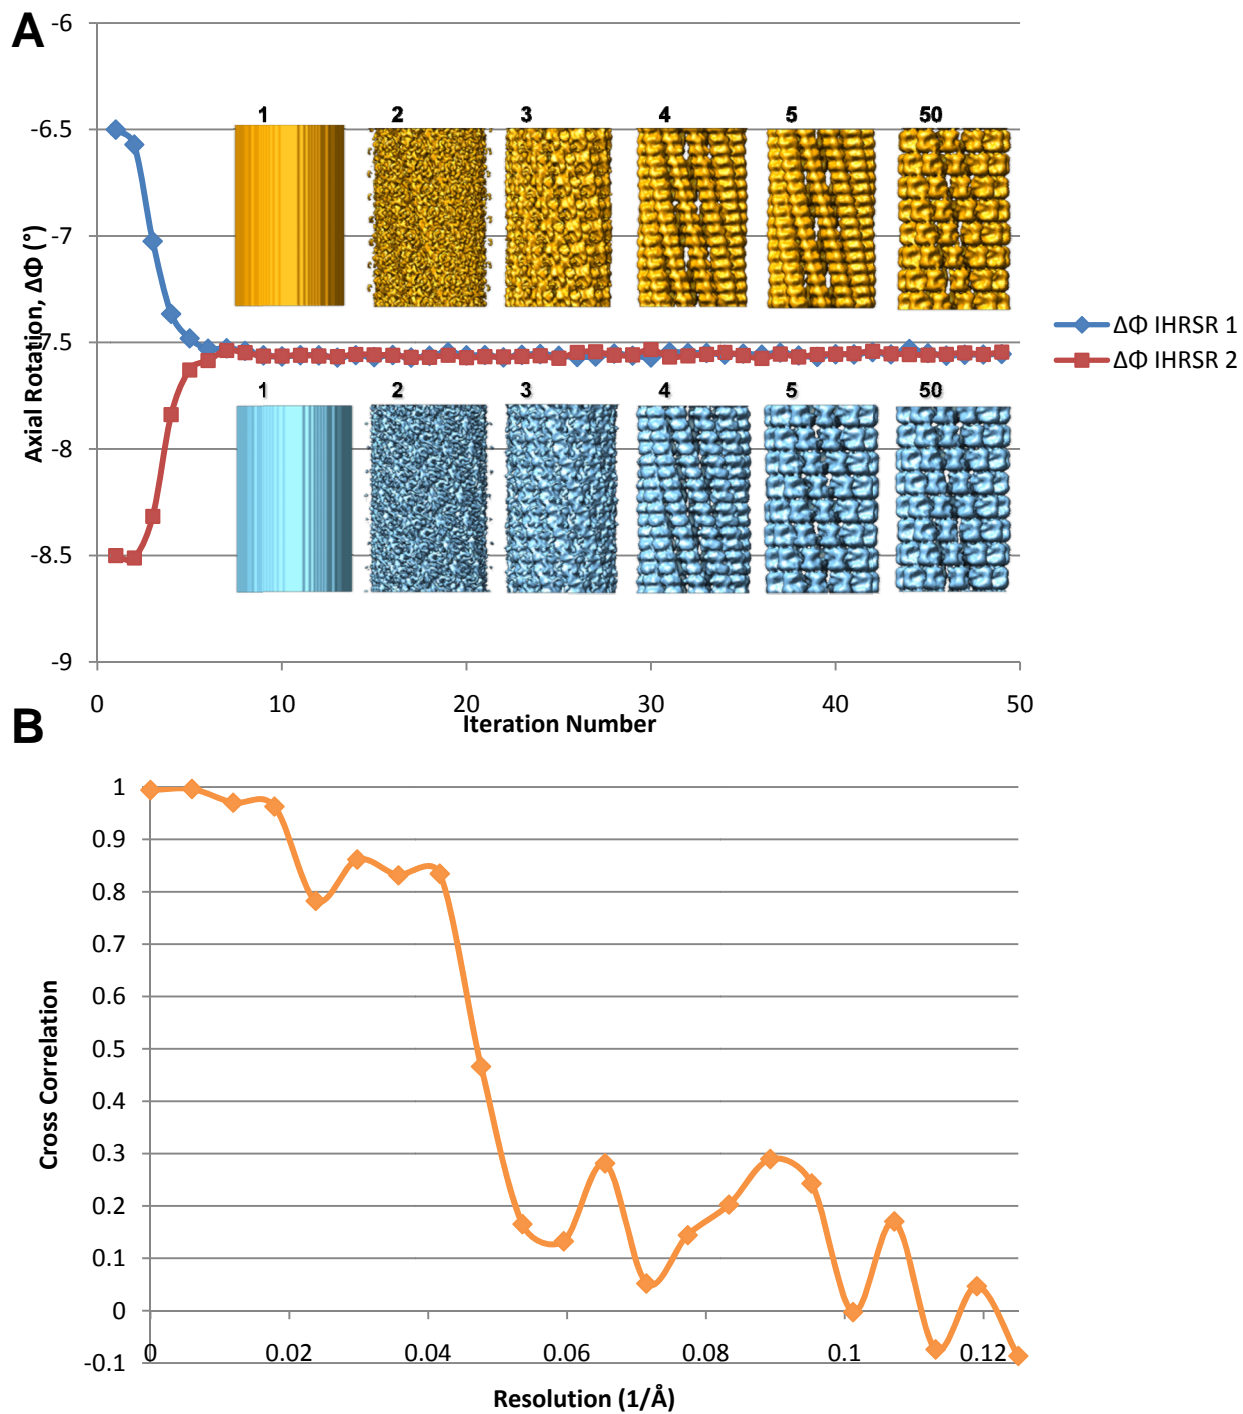

**Supplementary Figure 2.** (A) Convergence of the helical parameters between two reconstructions initiated from blank cylinder reference models and different initial guesses of the axial rotation values, namely  $-6.5^\circ$  and  $-8.5^\circ$ . (B) Fourier shell correlation between two independently generated reconstructions which falls to a correlation of 0.5 at 20 Å.
